# Supplementary material for: Self-assembly of birnessite nanoflowers by staged three-dimensional oriented attachment
Source: Royal Society of Chemistry journal article supplement (doi:10.1039/c6en00619a), 2017-01-01
Supplement: c6en00619a1.pdf [file c6en00619a1.pdf]

## Self-Assembly of Birnessite Nanoflowers by Staged Three-Dimensional Oriented Attachment

Xinran Liang,<sup>a</sup> Zixiang Zhao,<sup>a</sup> Mengqiang Zhu,<sup>b</sup> Fan Liu,<sup>a</sup> Lijun Wang,<sup>a</sup> Hui Yin,<sup>a</sup>  
Guohong Qiu,<sup>a</sup> Feifei Cao,<sup>c</sup> Xiaoqing Liu,<sup>d</sup> Xionghan Feng<sup>\*a</sup>

<sup>a</sup> *Key Laboratory of Arable Land Conservation (Middle and Lower Reaches of Yangtze River), Ministry of Agriculture, College of Resources and Environment, Huazhong Agricultural University, Wuhan 430070, China*

<sup>b</sup> *Department of Ecosystem Science and Management, University of Wyoming, Laramie, WY, 82071, United States.*

<sup>c</sup> *College of Science, Huazhong Agricultural University, Wuhan 430070, China*

<sup>d</sup> *Materials Research and Testing Center, Wuhan University of Technology, Wuhan 430070, China.*

\*Corresponding author:

Xionghan Feng, Tel: +86 027 87280271; Fax: +86 27 87288618; E-mail: fxh73@mail.hzau.edu.cn

SI Supporting material and methods

**S1. High-energy X-ray total scattering.** Synchrotron Synchrotron-based X-ray total scattering data were collected using an X-ray of 58.6491 keV ( $\lambda = 0.2114 \text{ \AA}$ ) at beamline 11-ID-B of the Advanced Photon Source (APS), Argonne National Laboratory (APS). The measurement was performed using the rapid acquisition PDF method by employing a Perkin Elmer amorphous silicon detector. The image plate was exposed for 1 s and the measurement was repeated 120 times for a total collection time

of 120 s for each sample. The software Fit2D was used to integrate and convert the 2-D raw data to 1-D intensity versus wave vector ( $Q$ ) data. The PDF,  $G(r)$ , was obtained from the raw 1-D data using the program PDFgetX2.

**S2. X-ray photoelectron spectroscopy.** X-ray photoelectron spectra were collected using a VG Multilab2000 X-ray photoelectron spectrometer with an Al K X-ray source (1486 eV) and a base pressure of  $3 \times 10^{-9}$  Torr in the analytical chamber. The scans were recorded using the large area mode. The survey scans were collected using a fixed pass energy of 100 eV and an energy step size of 1.0 eV, whereas the narrow scans have a pass energy of 25 eV and an energy step size of 0.1 eV. The charge effect was corrected by adjusting the binding energy (BE) of C (1s) to 284.62 eV. The spectra were analyzed using the Avantage software. The Shirley-type background was subtracted before deconvolution and fitting. The parameters used by Nesbitt et al for the multiplet peaks of Mn ( $2p_{3/2}$ ) for spectra fitting were adopted. A 20:80 ratio of the Lorentzian: Gaussian mix-sum function was used for all the fittings.

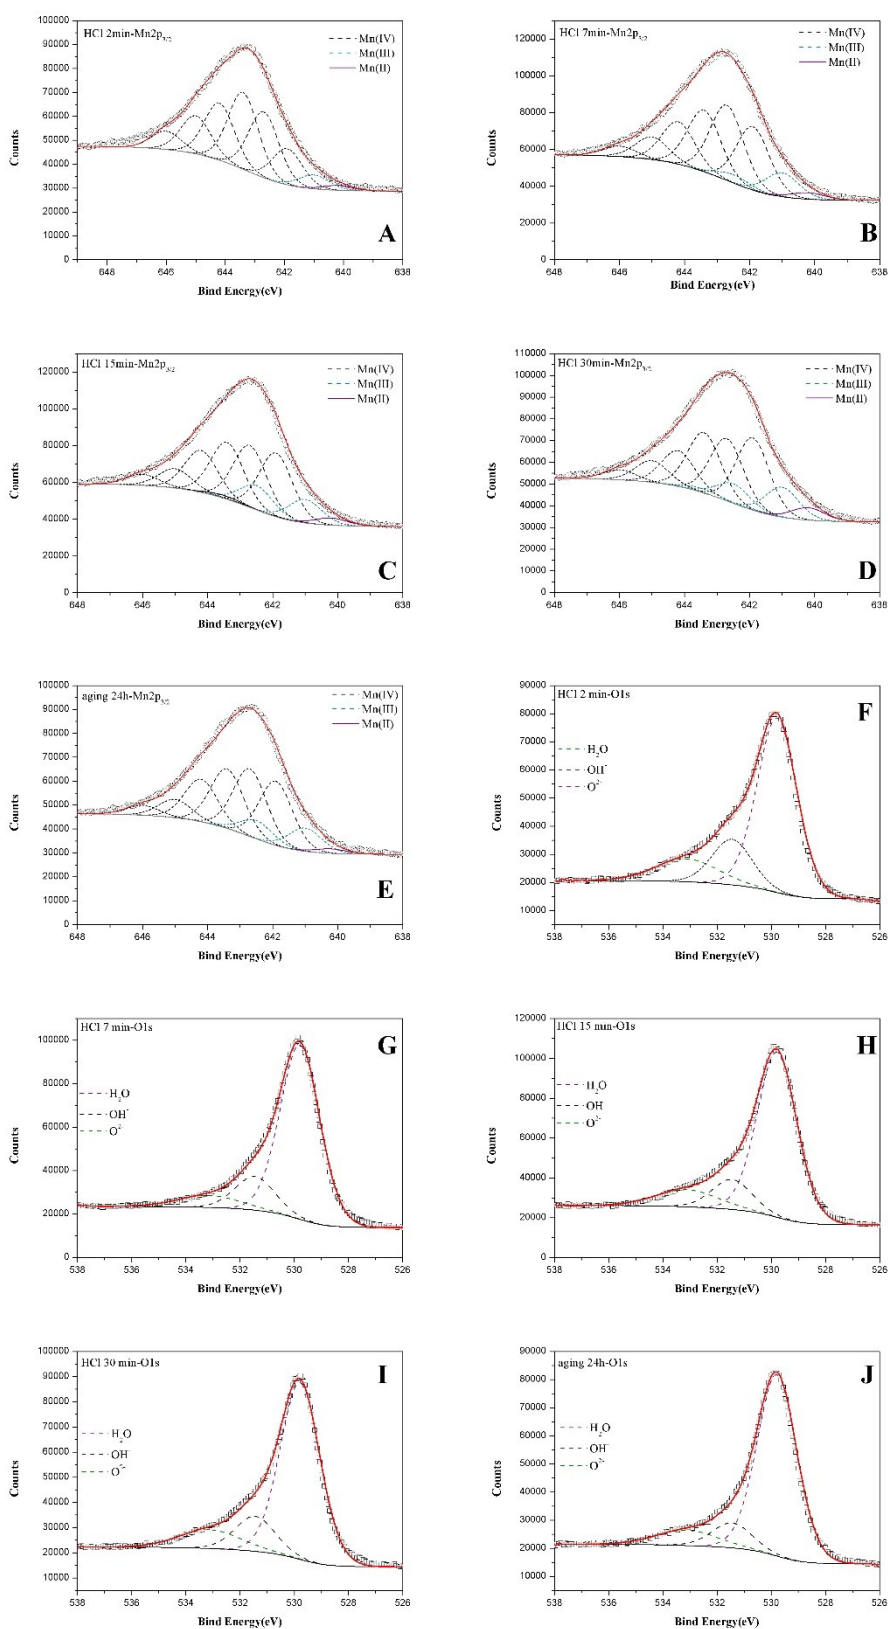

Fig. S1 XPS broad scans of Mn 2p<sub>3/2</sub> spectra of intermediate products at HCl 2min, 7min, 15 min, 30min and aging 24 h (A to E). And the O1s spectra of intermediate products at HCl 2min, 7min, 15 min, 30min and aging 24 h show in image F to L.

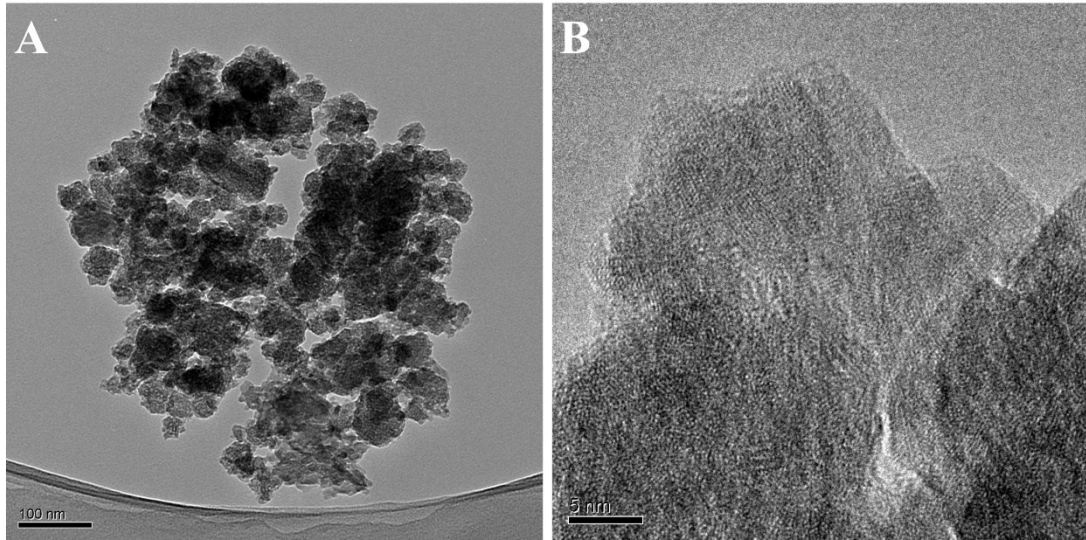

Fig. S2 TEM (A) image of the primary particles formed at 2 min of HCl addition.  
HRTEM image (B) of the primary particles.

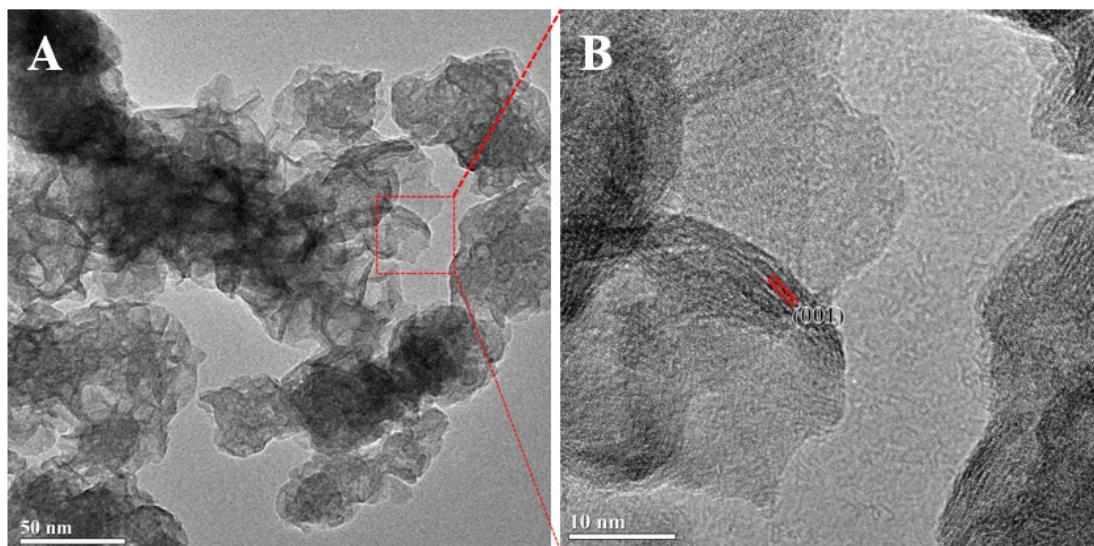

Fig. S3 TEM (A) image of the intermediate nanoflowers formed at 7 min of HCl addition. Image B is HRTEM image in the region of red area outlined in image A. The corresponding birnessite *d*-spacing indicated by the red parallel lines.

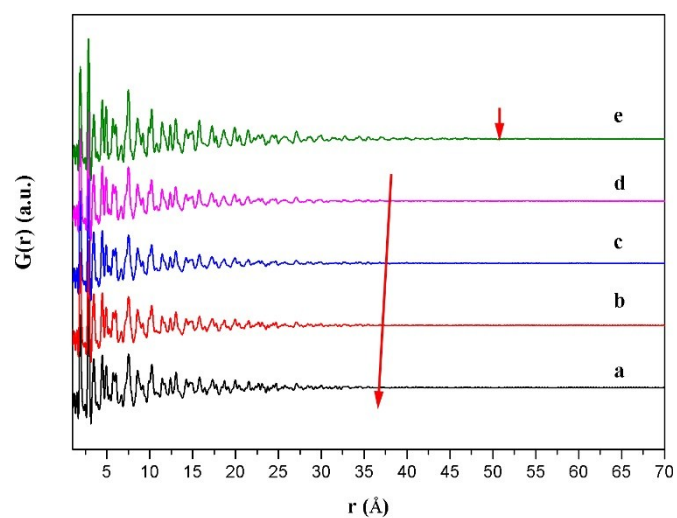

Fig. S4 Pair distribution function [G(r)] of intermediate products at different intervals of birnessite formation and crystal growth: (a) HCl, 2 min; (b) HCl, 7 min; (c) HCl, 15 min; (d) HCl, 30 min; and (e) aging 24 h with the r range of 1-70Å.

Table S1. Estimation of Thicknesses in the stacking direction based on (001) diffraction peaks using the scherer equation and the d-spacing of (100) and (110) peaks of intermediate products

| Samples   | Thickness <sub>001</sub> (nm) | $d_{100}$ (Å) | $d_{110}$ (Å) |
|-----------|-------------------------------|---------------|---------------|
| HCl 2min  |                               | 2.459         | 1.426         |
| HCl 7min  | 4.09                          | 2.440         | 1.416         |
| HCl 15min | 4.35                          | 2.436         | 1.416         |
| HCl 30min | 5.70                          | 2.436         | 1.413         |
| aging 24h | 7.30                          | 2.436         | 1.413         |

Table S2. Concentration of  $\text{KMnO}_4$  and pH in solution at various time intervals during birnessite formation process.

|              | Concentration of $\text{KMnO}_4$ mol/L | pH   |
|--------------|----------------------------------------|------|
| HCl 2min     | 0.381                                  | 1.21 |
| HCl 7min     | 0.354                                  | 0.83 |
| HCl 15min    | 0.298                                  | 0.79 |
| HCl 30min    | 0.195                                  | 0.72 |
| 60 aging 24h | 0.190                                  | 0.78 |
